# Supplementary material for: Immune modulation resulting from MR-guided high intensity focused ultrasound in a model of murine breast cancer
Source: PubMed Central journal article supplement (PMC7806949; doi:10.1038/s41598-020-80135-1), 2021-01-13
Supplement: 41598_2020_80135_MOESM1_ESM.pdf [file 41598_2020_80135_MOESM1_ESM.pdf]

*Supplementary Figures and Tables*

*for*

**Immune modulation resulting from MR-guided high  
intensity focused ultrasound in a model of murine  
breast cancer**

Brett Z. Fite, James Wang, Aris Kare, Asaf Ilovitsh, Michael Chavez, Tali Ilovitsh, Nisi Zhang, Weiyu Chen, Elise Robinson, Hua Zhang, Azadeh Kheirolomoom, Matthew T. Silvestrini, Elizabeth S. Ingham, Lisa M. Mahakian, Sarah M. Tam, Ryan R. Davis, Clifford G. Tepper, Alexander D. Borowsky, Katherine W. Ferrara

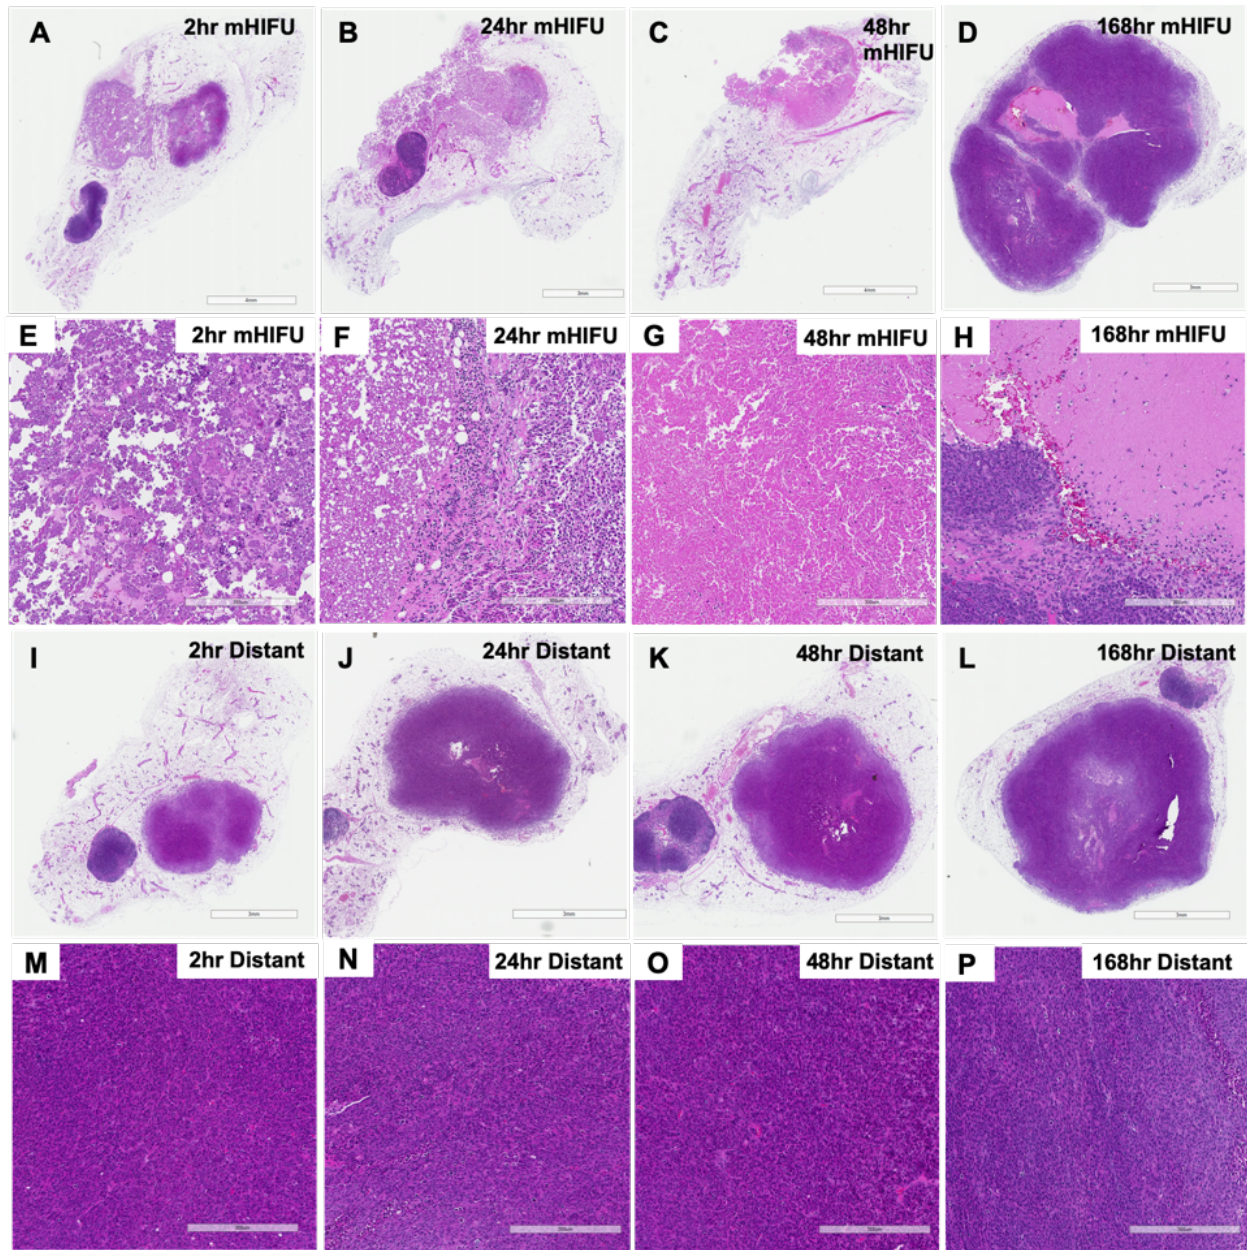

**Supplementary Figure S1. Mechanical HIFU causes tissue disorganization.** H&E stained directly-treated tumor sections at (A) 2 h, (B) 24 h, (C) 48 h, and (D) one week post mechanical ablation and (E-H) magnified views of the same sections as in the top row. H&E stained sections of the corresponding distant tumors at (I) 2 h, (J) 24 h, (K) 48 h, and (L) one week along with (M-P) magnified views of the same distant tumors.

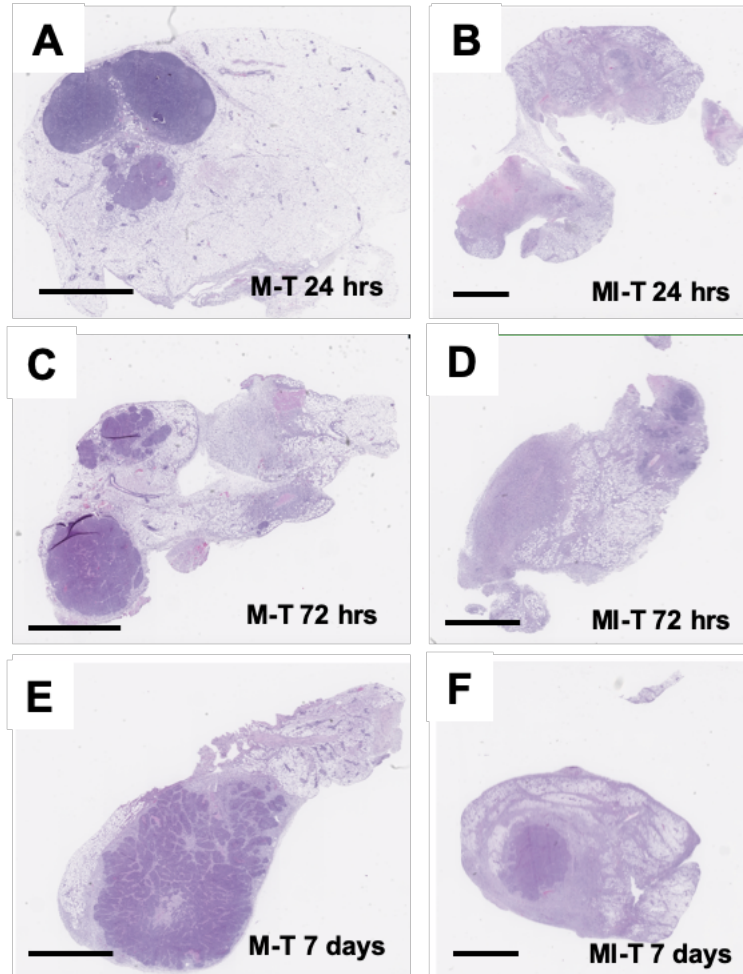

**Supplementary Figure S2. Mechanical HIFU causes cell death, pretreatment with immunotherapy enhances this effect.** At 24hr post mechanical HIFU, (A) tumors remain viable on H&E for tumors treated with a monotherapy. Addition of immunotherapy (B) results in extensive loss of tumor cell viability. At 72hr post mechanical HIFU, there is reduced viability in (C) mHIFU only that is further reduced in (D) the combination of mHIFU and immunotherapy. At 7 days post mechanical HIFU (E) mHIFU only tumors have increased in size while (F) treatments in the combination cohort have little viable tumor remaining. All scale bars represent 2mm.

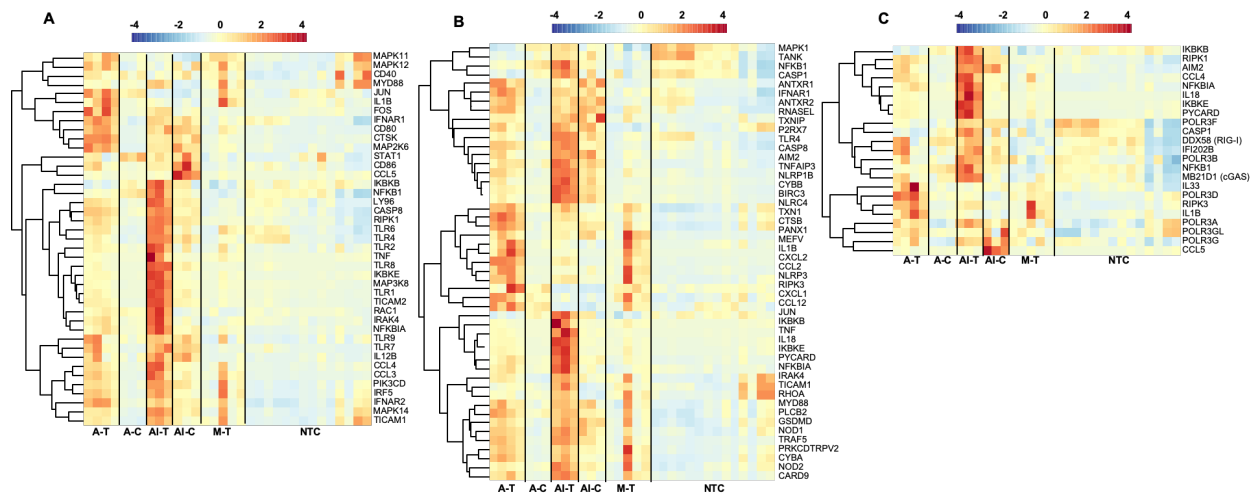

**Supplementary Figure S3. Innate immune signaling pathways.** Heatmap visualization of Z-scores for (A) Toll-like receptor signaling pathway, (B) NOD-like receptor signaling pathway, and (C) cytosolic DNA sensing and signaling pathway. The heatmaps were created in R Studio v1.2.5001 (<https://rstudio.com>).

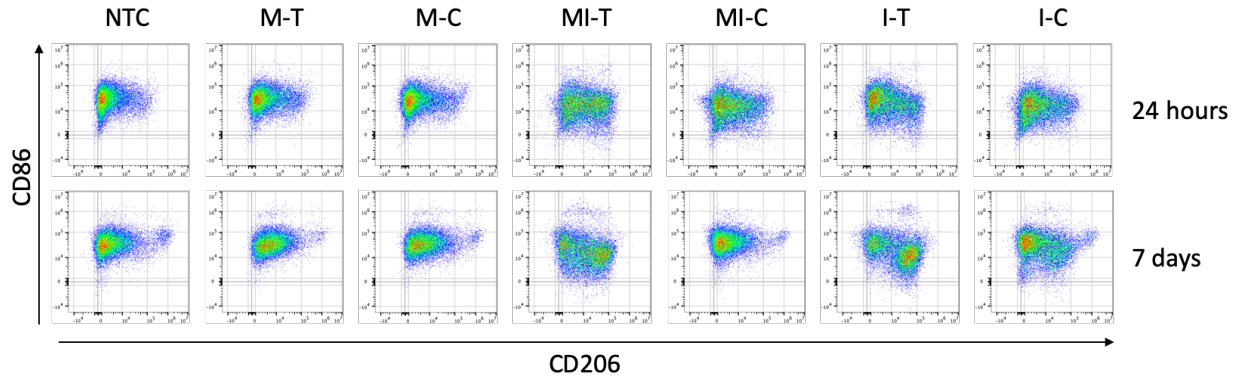

**Supplementary Figure S4. Mechanical HIFU combined with immunotherapy alters populations of CD86<sup>+</sup> CD206<sup>+</sup> macrophages.** Cd206<sup>low</sup> macrophage populations are reduced by the combined mHIFU-immunotherapy treatment in the treated tumor at both 24hr and 7 days post HIFU. Each plot shows an equal representation of 20k cells for each cohort. The plots were created in FlowJo v10.7 (<https://www.flowjo.com>).

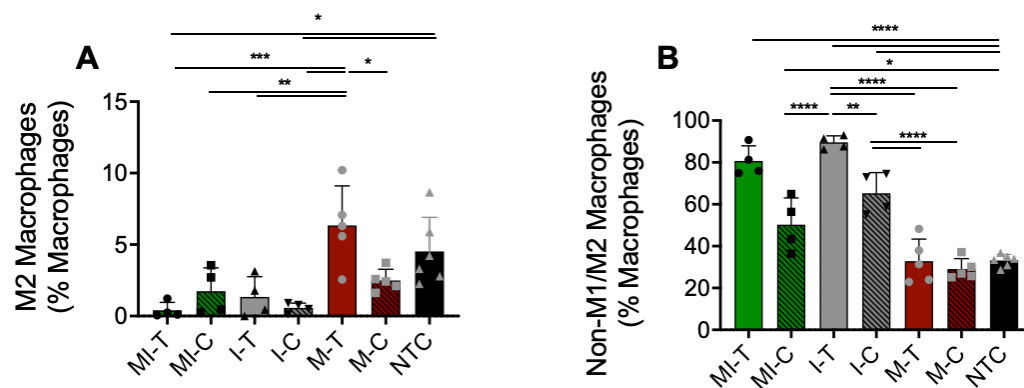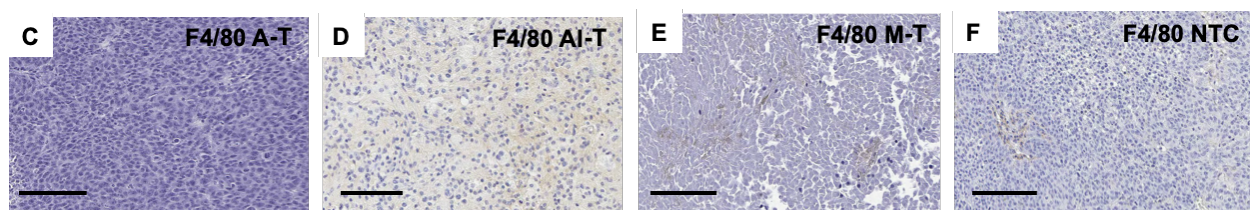

**Supplementary Figure S5. Immunotherapy alters macrophage polarization of tumors treated with mechanical HIFU.**

Flow cytometry quantification of (A) M2 polarized macrophages and (B) macrophages with neither M1 nor M2 polarization as a percentage of total macrophages within the tumor. F4/80 IHC stained sections of (C) a thermally-ablated tumor, (D) a tumor that received both thermal ablation and immunotherapy, (E) a tumor treated with mechanical HIFU, and (F) an untreated control tumor. Scale bar represents 100  $\mu\text{m}$  in all cases. Time points are: one-week post ablation for all cohorts that received thermal ablation, and 24 hours post HIFU for cohorts that received mechanical HIFU. Data are expressed as mean  $\pm$  SD. \* $p < 0.05$ , \*\* $p < 0.01$ , \*\*\* $p < 0.001$ , \*\*\*\* $p < 0.0001$  (ordinary one-way ANOVA with Tukey correction for multiple hypotheses).

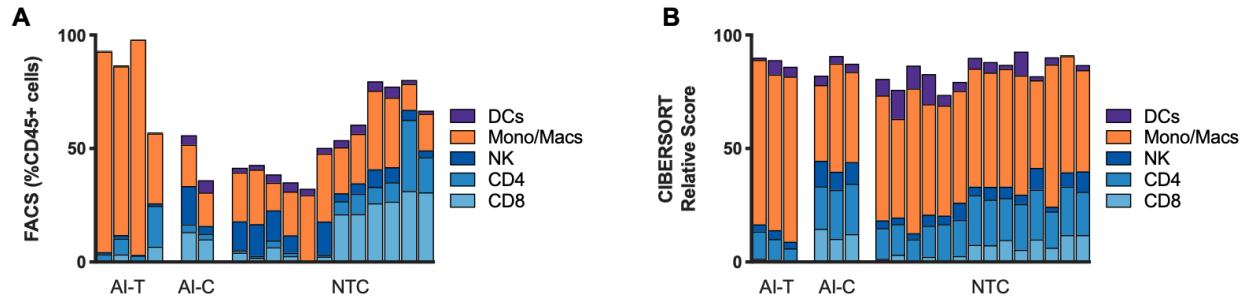

**Supplementary Figure S6. Ablation increases macrophage infiltration.** Myeloid cells were underestimated in (A) flow cytometry quantification compared to (B) CIBERSORT imputed proportions. However, both methodologies validated increases in tumor macrophages following ablation.

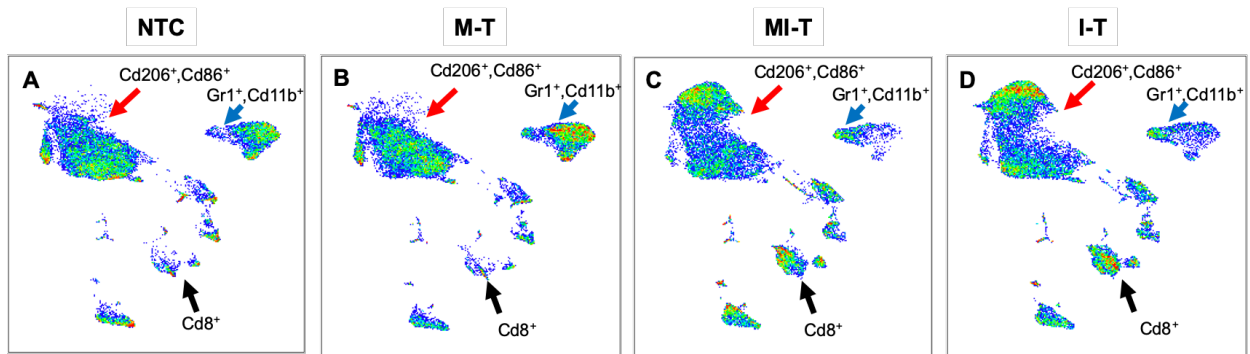

**Supplementary Figure S7. The combination of mechanical ablation and immunotherapy enrich CD8<sup>+</sup> T cell populations one week after HIFU.** uMAP plots at the 7 day timepoint of (A) control, (B) mechanically ablated, (C) mechanical HIFU pretreated with immunotherapy, and immunotherapy alone tumors. Black and red arrows indicate immune populations that change with treatment. Black arrows indicate Cd8a<sup>+</sup> populations, red arrows indicate Cd206<sup>+</sup>, Cd86<sup>+</sup> cell populations, and blue arrows indicate Gr1<sup>+</sup>, Cd11b<sup>+</sup> cell populations. Individual uMAPs were generated using uMAP v3.1 on FlowJo v10.7 (<https://www.flowjo.com/exchange/#/plugin/profile?id=6>) using all markers except CD45 and Live/Dead as parameters with 15 nearest neighbors and 0.01 minimum distance.



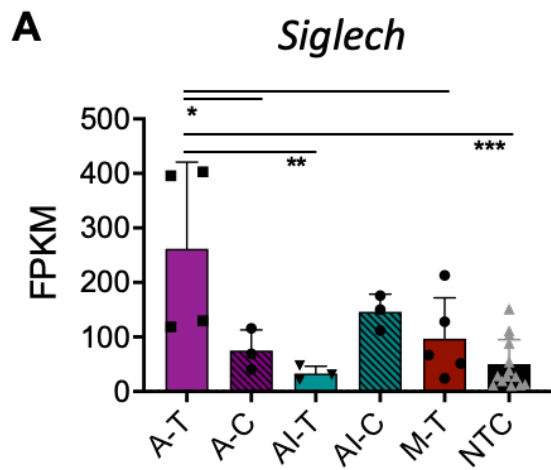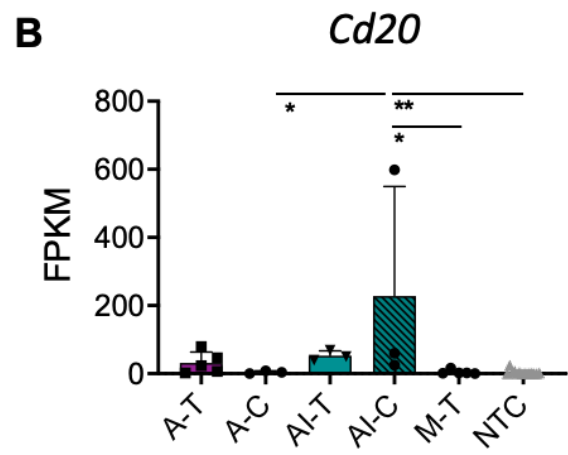

**Supplementary Figure S8. Humoral response to HIFU.** FPKM values of (A) *Siglech* and (B) *Cd20*.

Supplementary Table S1: Top gene ontology terms for ECM remodeling and wound healing for each treatment

| Ablation+Immunotherapy                                 |       |                          | Thermal Ablation                                       |       |                          | Mechanical ablation                                  |       |                          |
|--------------------------------------------------------|-------|--------------------------|--------------------------------------------------------|-------|--------------------------|------------------------------------------------------|-------|--------------------------|
| GO Term                                                | Genes | P Value                  | GO Term                                                | Genes | P Value                  | GO Term                                              | Genes | P Value                  |
| GO:0006935<br>Chemotaxis                               | 46    | 1.45 x 10 <sup>-13</sup> | GO:0007155<br>Cell adhesion                            | 165   | 5.55 x 10 <sup>-30</sup> | GO:0006935<br>Chemotaxis                             | 31    | 2.37 x 10 <sup>-11</sup> |
| GO:0007155<br>Cell adhesion                            | 106   | 2.98 x 10 <sup>-10</sup> | GO:0001525<br>Angiogenesis                             | 100   | 3.97 x 10 <sup>-26</sup> | GO:001525<br>Angiogenesis                            | 45    | 8.23 x 10 <sup>-11</sup> |
| GO:0045766<br>Positive regulation of angiogenesis      | 36    | 2.71 x 10 <sup>-7</sup>  | GO:0030198<br>ECM organization                         | 40    | 2.82 x 10 <sup>-8</sup>  | GO:0007155<br>Cell adhesion                          | 64    | 2.55 x 10 <sup>-8</sup>  |
| GO:0032715<br>Negative regulation of IL-6 production   | 16    | 3.05 x 10 <sup>-7</sup>  | GO:0030199<br>Collagen fibril organization             | 21    | 3.00 x 10 <sup>-8</sup>  | GO:0030199<br>Collagen fibril organization           | 14    | 3.65 x 10 <sup>-7</sup>  |
| GO:0030574<br>Collagen catabolic process               | 14    | 5.75 x 10 <sup>-7</sup>  | GO:0030574<br>Collagen catabolic process               | 16    | 4.76 x 10 <sup>-8</sup>  | GO:0045766<br>Positive regulation of angiogenesis    | 24    | 1.47 x 10 <sup>-6</sup>  |
| GO:0001525<br>Angiogenesis                             | 55    | 1.57 x 10 <sup>-6</sup>  | GO:0042060<br>Wound healing                            | 34    | 1.61 x 10 <sup>-7</sup>  | GO:0007160<br>Cell-matrix adhesion                   | 18    | 4.98 x 10 <sup>-6</sup>  |
| GO:0042060<br>Wound healing                            | 27    | 2.15 x 10 <sup>-5</sup>  | GO:0032755<br>Positive regulation of IL-6 production   | 22    | 2.14 x 10 <sup>-6</sup>  | GO:0032755<br>Positive regulation of IL-6 production | 13    | 6.70 x 10 <sup>-5</sup>  |
| GO:0032733:<br>Positive regulation of IL-10 production | 12    | 2.06 x 10 <sup>-5</sup>  | GO:0032733:<br>Positive regulation of IL-10 production | 9     | 0.009421                 | GO:0042060<br>Wound healing                          | 17    | 2.20 x 10 <sup>-4</sup>  |

Supplementary Table S2: Innate immune response gene ontology terms for each treatment

| Ablation+Immunotherapy               |       |                        | Thermal Ablation                                  |       |                        | Mechanical ablation                     |       |                       |
|--------------------------------------|-------|------------------------|---------------------------------------------------|-------|------------------------|-----------------------------------------|-------|-----------------------|
| GO Term                              | Genes | P Value                | GO Term                                           | Genes | P Value                | GO Term                                 | Genes | P Value               |
| GO:0002376<br>Immune system process  | 147   | $2.87 \times 10^{-41}$ | GO:0002376<br>Immune system process               | 115   | $2.80 \times 10^{-16}$ | GO:0002376<br>Immune system process     | 55    | $1.63 \times 10^{-8}$ |
| GO:0045087<br>Innate immune response | 111   | $2.53 \times 10^{-18}$ | GO:0032496<br>Response to LPS                     | 70    | $4.05 \times 10^{-14}$ | GO:0032496<br>Response to LPS           | 32    | $1.81 \times 10^{-6}$ |
| GO:0006955<br>Immune response        | 81    | $2.61 \times 10^{-15}$ | GO:0006955<br>Immune response                     | 69    | $5.62 \times 10^{-7}$  | GO:0045084<br>Innate immune response    | 50    | $4.93 \times 10^{-6}$ |
| GO:0032496<br>Response to LPS        | 63    | $1.27 \times 10^{-13}$ | GO:0045087<br>Innate immune response              | 92    | $7.40 \times 10^{-7}$  | GO:0006955<br>Immune response           | 30    | 0.003484              |
| GO:0042832<br>Response to protozoan  | 20    | $3.14 \times 10^{-11}$ | GO:0014068<br>Positive regulation of phagocytosis | 20    | $9.20 \times 10^{-6}$  | GO:0051607<br>Defense response to virus | 21    | 0.003899              |

Supplementary Table S3 Enriched adaptive immune response GO terms for each treatment

| Ablation+Immunotherapy                                       |       |                        | Thermal Ablation                                             |       |                       | Mechanical ablation                                                  |       |          |
|--------------------------------------------------------------|-------|------------------------|--------------------------------------------------------------|-------|-----------------------|----------------------------------------------------------------------|-------|----------|
| GO Term                                                      | Genes | P Value                | GO Term                                                      | Genes | P Value               | GO Term                                                              | Genes | P Value  |
| GO:0002250<br>Adaptive immune response                       | 52    | $2.16 \times 10^{-14}$ | GO:0042110<br>T cell activation                              | 19    | $7.80 \times 10^{-8}$ | GO:0046641<br>Cellular response to IFN gamma                         | 12    | 0.003102 |
| GO:0042102<br>Positive regulation of T cell proliferation    | 30    | $2.10 \times 10^{-11}$ | GO:0050870<br>Positive regulation of T cell activation       | 12    | $1.93 \times 10^{-6}$ | GO:0046641<br>Positive regulation of alpha-beta T cell proliferation | 4     | 0.02751  |
| GO:0050852<br>T cell receptor signaling pathway              | 25    | $4.26 \times 10^{-10}$ | GO:0042102<br>Positive regulation of T cell proliferation    | 25    | $2.00 \times 10^{-6}$ | GO:0042098<br>T cell proliferation                                   | 5     | 0.05936  |
| GO:0042110<br>T cell activation                              | 17    | $3.56 \times 10^{-7}$  | GO:0030217<br>T cell differentiation                         | 17    | $5.70 \times 10^{-5}$ |                                                                      |       |          |
| GO:0032729<br>Positive regulation of IFN $\gamma$ production | 21    | $7.19 \times 10^{-7}$  | GO:0002250<br>Adaptive immune response                       | 33    | 0.002257              |                                                                      |       |          |
| GO:0031295<br>T cell costimulation                           | 14    | $1.07 \times 10^{-6}$  | GO:0032729<br>Positive regulation of IFN $\gamma$ production | 16    | 0.003623              |                                                                      |       |          |
| GO:0050870<br>Positive regulation of T cell activation       | 11    | $4.47 \times 10^{-6}$  | GO:0031295<br>T cell costimulation                           | 10    | 0.004618              |                                                                      |       |          |

Supplementary Table S4 Cytokine and chemokine enriched GO terms for directly-treated tumors

| Ablation+Immunotherapy                                    |       |                         | Thermal Ablation                                           |       |                          | Mechanical ablation                                                 |       |                         |
|-----------------------------------------------------------|-------|-------------------------|------------------------------------------------------------|-------|--------------------------|---------------------------------------------------------------------|-------|-------------------------|
| GO Term                                                   | Genes | P Value                 | GO Term                                                    | Genes | P Value                  | GO Term                                                             | Genes | P Value                 |
| GO:0030593<br>Neutrophil chemotaxis                       | 27    | 2.64 x 10 <sup>-8</sup> | GO:0030593<br>Neutrophil chemotaxis                        | 33    | 6.76 x 10 <sup>-11</sup> | GO:0030593<br>Neutrophil chemotaxis                                 | 20    | 2.63 x 10 <sup>-8</sup> |
| GO:0001816<br>Cytokine production                         | 13    | 8.21 x 10 <sup>-6</sup> | GO:0019221<br>Chemokine mediated signaling pathway         | 44    | 6.98 x 10 <sup>-7</sup>  | GO:0002523<br>Leukocyte migration involved in inflammatory response | 8     | 4.49 x 10 <sup>-6</sup> |
| GO:0070098<br>Chemokine mediated signaling pathway        | 20    | 8.69 x 10 <sup>-6</sup> | GO:0090023<br>Positive regulation of neutrophil chemotaxis | 16    | 7.87 x 10 <sup>-7</sup>  | GO:0071347<br>Cellular response to IL-1                             | 17    | 2.95 x 10 <sup>-5</sup> |
| GO:0032722<br>Positive regulation of chemokine production | 10    | 2.13 x 10 <sup>-4</sup> | GO:0050715<br>Positive regulation of cytokine secretion    | 17    | 3.18 x 10 <sup>-6</sup>  | GO:0070098<br>Chemokine mediated signaling pathway                  | 13    | 1.20 x 10 <sup>-4</sup> |
| GO:0071345<br>Cellular response to cytokine stimulus      | 13    | 2.27 x 10 <sup>-4</sup> | GO:0070098<br>Chemokine mediated signaling pathway         | 22    | 6.19 x 10 <sup>-6</sup>  | GO:0002544<br>Chronic inflammatory response                         | 5     | 4.56 x 10 <sup>-4</sup> |
| GO:0050715<br>Positive regulation of cytokine secretion   | 13    | 3.13 x 10 <sup>-4</sup> | GO:0071347<br>Cellular response to IL-1                    | 25    | 1.39 x 10 <sup>-4</sup>  | GO:0019221<br>Cytokine mediated signaling pathway                   | 21    | 7.65 x 10 <sup>-4</sup> |

Supplementary Table S5 Enriched B cell GO terms for each treatment

| Ablation+Immunotherapy                                      |       |                         | Thermal Ablation                                                       |       |                         | Mechanical ablation                                            |       |                         |
|-------------------------------------------------------------|-------|-------------------------|------------------------------------------------------------------------|-------|-------------------------|----------------------------------------------------------------|-------|-------------------------|
| GO Term                                                     | Genes | P Value                 | GO Term                                                                | Genes | P Value                 | GO Term                                                        | Genes | P Value                 |
| GO:0050853<br>B cell receptor signaling pathway             | 25    | 2.88 x 10 <sup>-9</sup> | GO:0050861<br>Positive regulation of B cell receptor signaling pathway | 6     | 8.32 x 10 <sup>-4</sup> | GO:0030889<br>Negative regulation of B cell proliferation      | 7     | 5.68 x 10 <sup>-4</sup> |
| GO:0045579<br>Positive regulation of B cell differentiation | 11    | 8.99 x 10 <sup>-6</sup> | GO:0030890<br>Positive regulation of B cell proliferation              | 15    | 0.001384                | GO:0001782<br>B cell homeostasis                               | 7     | 0.004588                |
| GO:0042113<br>B cell activation                             | 12    | 2.69 x 10 <sup>-4</sup> | GO:0050853<br>B cell receptor signaling pathway                        | 15    | 0.01553                 | GO:0002322<br>B cell proliferation involved in immune response | 3     | 0.03438                 |
